# Supplementary material
Source: Elsevier journal article supplement (https://www.sciencedirect.com/science/article/pii/S0210480618300524)
Supplement: mmc1 [file S0210480618300524:mmc1.docx]

Tabla online 1. Análisis de riesgo univariable para determinar predictores de recurrencia bioquímica temprana

| Variable | OR (IC 95%) | *p* |
| --- | --- | --- |
| Edad, años  <65  ≥65 | 1.0 Ref  1.12 (0.97–1.15) | 0.912 |
| PSA preoperatorio | 9.23 (3.97–28.07) | 0.002 |
| Historia familiar CaP  No  Si | 1.0 Ref  2.46 (0.87–4.58) | 0.117 |
| Tipo de cirugía  PRR  PRL | 1.0 Ref  10.73 (4.60–30.6) | 0.001 |
| Estadio patológico  pT2  pT3a–4a | 1.0 Ref  1.54 (0.56–2.93) | 0.214 |
| Score Gleason patológico  ≤6  7 (3 + 4)  7 (4 + 3)  ≥8 | 1.0 Ref  5.83 (0.97–8.97)  2.42 (0,53–4.85)  5.05 (0.87–8.95) | 0.11  0.77  0.025 |
| Márgenes quirúrgicos  Negativos  Positivos | 1.0 Ref  13.26 (8.57–35.65) | <0.001 |
| Extensión extracapsular  No  Si | 1.0 Ref  2.31 (0.86–4.67) | 0.128 |
| Invasión ganglios linfáticos  Negativa  Positiva | 1.0 Ref  9.94 (5.39–20.3) | 0.002 |

IC = intervalo de confianza; OR = odds ratio; PRL = prostatectomía radical laparoscópica; PSA = antígeno prostático específico; PRR= prostatectomía radical robótica; Ref = referencia.

En esta tabla se muestra el análisis univariable con el fin de determinar los predictores de recurrencia bioquímica temprana (<12 meses) en los 383 pacientes que tuvieron recurrencia en el primer año después de la cirugía.

Tabla online 2. Análisis de riesgo univariable para determinar predictores de recurrencia bioquímica intermedia

| Variable | OR (IC 95%) | *p* |
| --- | --- | --- |
| Edad, años  <65  ≥65 | 1.0 Ref  1.06 (0.72–2.31) | 0.302 |
| PSA preoperatorio | 2.67 (0.91–4.64) | 0.102 |
| Historia familiar CaP  No  Si | 1.0 Ref  1.20 (0.58–1.73) | 0.273 |
| Tipo de cirugía  PRR  PRL | 1.0 Ref  9.52 (4.71–17–91) | 0.002 |
| Estadio patológico  pT2  pT3a–4a | 1.0 Ref  2.41 (0.86–6.43) | 0.299 |
| Score Gleason patológico  ≤6  7 (3 + 4)  7 (4 + 3)  ≥8 | 1.0 Ref  0.65 (0.53–2.02)  0.76 (0.41–1.91)  2.53 (0.69–7.28) | 0.418  0.382  0.112 |
| Márgenes quirúrgicos  Negativos  Positivos | 1.0 Ref  3.14 (0.95–5.01) | 0.076 |
| Extensión extracapsular  No  Si | 1.0 Ref  0.23 (0.11–1.08) | 0.625 |
| Invasión ganglios linfáticos  Negativa  Positiva | 1.0 Ref  4.39 (2.34–6.95) | 0.036 |

IC = intervalo de confianza; OR = odds ratio; PRL = prostatectomía radical laparoscópica; PSA = antígeno prostático específico; PRR= prostatectomía radical robótica; Ref = referencia.

En esta tabla se muestra el análisis univariable con el fin de determinar los predictores de recurrencia bioquímica intermedia (12-36 meses) en los 383 pacientes que tuvieron recurrencia entre 12-36 meses después de la cirugía.

Tabla online 3. Análisis de riesgo univariable para determinar predictores de recurrencia bioquímica tardía

| Variable | OR (IC 95%) | *p* |
| --- | --- | --- |
| Edad, años  <65  ≥65 | 1.0 Ref  1.31 (0.56–2.93) | 0.252 |
| PSA preoperatorio | 2.05 (0.87–4.58) | 0.152 |
| Historia familiar CaP  No  Si | 1.0 Ref  0.24 (0.09–0.87) | 0.62 |
| Tipo de cirugía  PRR  PRL | 1.0  32.35 (12.4–73.6) | <0.001 |
| Estadio patológico  pT2  pT3a–4a | 1.0 Ref  13.13 (6.57–43.83) | <0.001 |
| Score Gleason patológico  ≤6  7 (3 + 4)  7 (4 + 3)  ≥8 | 1.0 Ref  5.77 (2.81–12.35)  5.16 (3.02–11.65)  17.60 (7.34–45.6) | 0.015  <0.001  <0.001 |
| Márgenes quirúrgicos  Negativos  Positivos | 1.0 Ref  29.8 (11.23–64.3) | <0.001 |
| Extensión extracapsular  No  Si | 1.0 Ref  8.15 (4.21–16.67) | 0.04 |
| Invasión ganglios linfáticos  Negativa  Positiva | 1.0 Ref  1.18 (0.89–2.863) | 0.276 |

IC = intervalo de confianza; OR = odds ratio; PRL = prostatectomía radical laparoscópica; PSA = antígeno prostático específico; PRR= prostatectomía radical robótica; Ref = referencia.

En esta tabla se muestra el análisis de riesgo univariable con el fin de determinar los predictores de recidiva bioquímica tardía (> 36 meses) en los 382 pacientes que tuvieron recurrencia después del tercer año de la cirugía.
